# Supplementary material for: The Impact of Microsatellite Instability Status and Sidedness of the Primary Tumor on the Effect of Cetuximab-Containing Chemotherapy in Patients with Metastatic Colorectal Cancer
Source: PubMed Central journal article supplement — J Cancer. 2017 Aug 23;8(14):2809–15. doi: 10.7150/jca.18286 (PMC5604213; doi:10.7150/jca.18286), 2017-08-23
Supplement: jcav08p2809s1.pdf [file jcav08p2809s1.pdf]

Supplementary Table 1. The effect of cetuximab-containing treatment between left and right sided-colorectal cancer.

| Study                 | Treatment                   | Treatment line       | PFS                                  | OS                 |
|-----------------------|-----------------------------|----------------------|--------------------------------------|--------------------|
| JACCRO CC-05106 study | XELOX/FOLFOX+Cetuximab      | 1 <sup>st</sup> line | 11.1 m vs. 5.6 m<br>(Left vs. Right) | 36.2 m vs. 12.6 m  |
| Moretto et.al.        | Cetuximab+/-Irinotecan      | Salvage              | 6.6 m vs. 2.3 m<br>(Left vs. Right)  | -                  |
| Chen et.al.           | Cetuximab+/-Chemotherapy    | Salvage              | 4.59 m vs. 2.75<br>(Left vs. Right)  | 12.62 m vs. 8.07 m |
| Lu et.al.             | Standard Regimens+Cetuximab | 1 <sup>st</sup> line | 15.0 m vs. 5.3 m<br>(Left vs. Right) | 35.9 m vs. 14.4 m  |
| CRYSTAL study         | FOLFIRI+Cetuximab           | 1 <sup>st</sup> line | 12.0 m vs 8.1 m<br>(Left vs. Right)  | 27.7 m vs. 18.5    |
| FIRE3 study           | FOLFIRI+Cetuximab           | 1 <sup>st</sup> line | 10.7 m vs. 7.6 m<br>(Left vs. Right) | 38.3 m vs. 18.3 m  |
| The present Study     | Cetuximab+/-Chemotherapy    | 1 <sup>st</sup> line | 10.9 m vs. 7.1 m<br>(Left vs. Right) | -                  |
| The present Study     | Cetuximab+/-Chemotherapy    | 2 or more line       | 4.5 m vs. 5.8 m<br>(Left vs. Right)  |                    |
